# Supplementary material for: Quality of care assessment in geriatric evaluation and management units: construction of a chart review tool for a tracer condition
Source: Springer Nature journal article supplement (doi:10.1186/1471-2318-9-34), 2009-07-29
Supplement: Additional file 4 [file 1471-2318-9-34-s4.pdf]

Additional file 4. Dimensions of quality and proposed definitions of quality indicators in each area: Access to care, Comprehensiveness, Appropriateness, Continuity and Patient-centred care

| Dimension of quality                                                                                                                                                                             | Definition of indicators (exclusively reliable items included)                                                                                                                                                                                                                                                                                                                                                                                                                                                                                                                                                |                                                                                                                                                                                                                                                                                                                                                                                                                                                                                                                                                                                                                                                            |
|--------------------------------------------------------------------------------------------------------------------------------------------------------------------------------------------------|---------------------------------------------------------------------------------------------------------------------------------------------------------------------------------------------------------------------------------------------------------------------------------------------------------------------------------------------------------------------------------------------------------------------------------------------------------------------------------------------------------------------------------------------------------------------------------------------------------------|------------------------------------------------------------------------------------------------------------------------------------------------------------------------------------------------------------------------------------------------------------------------------------------------------------------------------------------------------------------------------------------------------------------------------------------------------------------------------------------------------------------------------------------------------------------------------------------------------------------------------------------------------------|
|                                                                                                                                                                                                  | All health care professionals <sup>1</sup>                                                                                                                                                                                                                                                                                                                                                                                                                                                                                                                                                                    | Specific health care professional                                                                                                                                                                                                                                                                                                                                                                                                                                                                                                                                                                                                                          |
| <b>Access to care:</b> Delay between date of acceptance onto GEMU service and date of entry to the GEMU bed, categories :<br>≤ 1 day<br>> 1 day and ≤ 2 days<br>> 2 days et < 4 days<br>≥ 4 days | From Additional file 1:<br><ul style="list-style-type: none"> <li>▪ Date of acceptance by GEMU’s consultant</li> <li>▪ Date of arrival at the GEMU</li> </ul>                                                                                                                                                                                                                                                                                                                                                                                                                                                 | From Additional file 1:<br>For each profession other than MD and nurse :<br><ul style="list-style-type: none"> <li>▪ Date of request for consultation</li> <li>▪ Start date of intervention</li> </ul>                                                                                                                                                                                                                                                                                                                                                                                                                                                     |
| <b>Comprehensiveness of care:</b><br>Sum of the number of items documented as present relative to the total number of applicable items (expressed as percentage)                                 | From Additional file 1: Items 1-3, 5-14, 16-21, 23-26, 31, 35-36, 38-53, 55-56, 58-76, 77-78, 80-81, 83-89, 91-104, 107, 109-111, 113-118, 121, 126, 141, 147, 152, 157, 161<br><br>Reasons for determining exclusion from some items:<br><b>1-37 and 104-112 (except items 9, 12, 21):</b> if severe communication problem or severe cognitive impairment or refusal to cooperate with care.<br><b>38-65 and 89-103:</b> if the patient is immobile or severe communication problem or refusal to cooperate<br><b>80-88 and 113-119:</b> if imminent discharge to long term care or rehabilitation elsewhere | From Additional file 1:<br><br>For each profession: sum of the number of items documented as present relative to the total number of items that are applicable (expressed as percentage) :<br><br><ul style="list-style-type: none"> <li>- Physician (md) : 65 items</li> <li>- Nurse (nurse) : 11 items</li> <li>- Physiotherapist (physio) : 38 items</li> <li>- Occupational therapist (ot) : 33 items</li> <li>- Social worker (sw) : 12 items</li> </ul> Qualitative analysis (insufficient items to calculate a score):<br><ul style="list-style-type: none"> <li>- Nutritionist (nutr) : 4 items</li> <li>- Pharmacist (pharm) : 2 items</li> </ul> |
| <b>Continuity of care:</b> Sum of the number of items documented as present relative to the number of items that are applicable (expressed as percentage)                                        | From Additional file 1:<br>Items 163, 166, 168-169                                                                                                                                                                                                                                                                                                                                                                                                                                                                                                                                                            | Not applicable                                                                                                                                                                                                                                                                                                                                                                                                                                                                                                                                                                                                                                             |
| <b>Patient-centred care :</b><br>(expressed in a 3-level variable)                                                                                                                               | From Additional file 1:<br><ul style="list-style-type: none"> <li>- item 120 (Level of care as expressed by the patient)</li> <li>- item 165 (Inform the patient and brief the family on the patient’s clinical situation)</li> </ul> Ordinal variable with 3 levels :<br><ul style="list-style-type: none"> <li>- neither item present</li> <li>- at least one item present</li> <li>- both items present</li> </ul>                                                                                                                                                                                         | Not applicable                                                                                                                                                                                                                                                                                                                                                                                                                                                                                                                                                                                                                                             |

---

**Appropriateness of care :**

Sum of items present within 4 clinical areas: cognitive status, bone health, cardiovascular health, vision and a combination score across all 4 categories. (average score for the applicable clinical areas expressed as percentage)

**Items pertaining to physicians**

From Additional file 1:

- Cognitive state: items 121-123, 125
- Bone health: items 147-151
- Cardiovascular health: items 152-156
- Vision: items 157-160

Score of appropriateness of each clinical area:

- If the clinical dimension is **normal**, there is not calculation for appropriateness in the area (thus, the number of scores of appropriateness will vary by individual)
- If the clinical dimension is **abnormal** as evaluated by the research nurse, scores will be determined by the following (expressed in 4 categories) :
  - Cognitive state: maximal score of 3 based on combination of the following 3 items : "Cognitive state assessment by the physician (present/absent)", "diagnosis (present/absent)" and "pertinence of medication (present/absent/not applicable)"
  - Cardiovascular health : maximal score of 6 determined by the sum of 3 sub-scores :
    - a) a sub-score of 2 evaluating the combination of the items " Cardiovascular health assessment by the physician (present/absent)", "diagnosis (present/absent)";
    - b) a sub-score of 2 evaluating the combination of items "Cardiovascular health assessment by the physician (present/absent)" and "if heart failure - non-pharmacologic interventions (present/absent/not applicable)";
    - c) a sub-score of 2 evaluating the combination of items "Cardiovascular health assessment by the physician (present/absent)" and "if previous cardiovascular event or known cardiovascular risk factors, prescription of preventive medication (present/absent/not applicable)"
  - Bone health : maximal score of 4 based on the following items : "Bone health assessment by the physician (present/absent)", "diagnosis (present/absent)", "Prescription of calcium (present/absent)", "Prescription of vitamin D (present/absent)", "Prescription of other osteoprotective medication (present/absent)"
  - Vision : maximal score of 4 based on the sum of 2 sub-scores :
    - a) a sub-score of 2 based on the combination of the items: "Vision assessment by the physician (present/absent)" and "diagnosis (present/absent)";
    - b) a sub-score of 2 based on items "Vision assessment by the physician (present/absent)" and "Evaluation by specialist if already not (present/absent/not applicable)"

---

<sup>1</sup>Data gathered for different health care professionals were aggregated to obtain a single value for each item (item documented by at least one health care professional)
